# Supplementary material for: A mixed methods process evaluation: understanding the implementation and delivery of HIV prevention services integrated within sexual reproductive health (SRH) with or without peer support amongst adolescents and young adults in rural KwaZulu-Natal, South Africa
Source: PubMed Central journal article supplement (PMC11223316; doi:10.1186/s13063-024-08279-3), 2024-07-03
Supplement: 13063_2024_8279_MOESM1_ESM.pdf [file 13063_2024_8279_MOESM1_ESM.pdf]

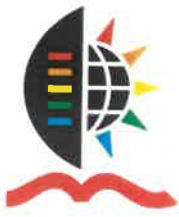

23 January 2020

Dr Maryam Shahmanesh  
AFRICA HEALTH RESEARCH INSTITUTE (AHRI)  
[m.shahmanesh@ucl.ac.uk](mailto:m.shahmanesh@ucl.ac.uk)

Dear Dr Shahmanesh,

Protocol reference number: BREC/00000473/2019

Project title: Isisekelo Sempilo: HIV prevention embedded in sexual health: A pilot trial to optimize peer (Thetha Nami) delivery of HIV prevention and care to adolescents and young adults in rural KwaZulu-Natal.

Non-Degree Purposes

### **FULL APPROVAL LETTER**

The Biomedical Research Ethics Committee (BREC) has considered the abovementioned application at a meeting held on 08 October 2019.

I wish to advise you that your response to BREC letter dated 17 October 2019 was noted and approved by the Biomedical Research Ethics Committee at a meeting held on 10 December 2019. Please ensure that site permissions are obtained and forwarded to BREC for approval before commencing research at a new site.

This approval is valid for one year from **23 January 2020**. To ensure uninterrupted approval of this study beyond the approval expiry date, an application for recertification must be submitted to BREC on the appropriate BREC form 2-3 months before the expiry date.

Any amendments to this study, unless urgently required to ensure safety of participants, must be approved by BREC prior to implementation.

Your acceptance of this approval denotes your compliance with South African National Research Ethics Guidelines (2015), South African National Good Clinical Practice Guidelines (2006) (if applicable) and with UKZN BREC ethics requirements as contained in the UKZN BREC Terms of Reference and Standard Operating Procedures, all available at <http://research.ukzn.ac.za/Research-Ethics/Biomedical-Research-Ethics.aspx>.

BREC is registered with the South African National Health Research Ethics Council (REC-290408-009). BREC has US Office for Human Research Protections (OHRP) Federal-wide Assurance (FWA 678).

Pg. 1/...

---

Biomedical Research Ethics Committee  
Prof V Rambiritch (Chair)  
UKZN Research Ethics Office Westville Campus, Govan Mbeki Building  
Postal Address: Private Bag X54001, Durban 4000  
Website: <http://research.ukzn.ac.za/Research-Ethics/>

The following Committee members were present at the meeting that took place on 08 October 2019:

|                       |                                       |
|-----------------------|---------------------------------------|
| Prof V Rambiritch     | Pharmacology (Chair)                  |
| Prof D Wassenaar      | Psychology (Deputy Chair)             |
| Dr N Abbai            | Microbiology and Molecular Biology    |
| Prof C Aldous         | Genetics                              |
| Prof R Bhimma         | Paediatrics & Child Health            |
| Dr R Harrichandparsad | Neurosurgery                          |
| Dr K Hlongwana        | Public Health                         |
| Dr H Humphries        | Research Psychology and Public Health |
| Dr M Khan             | HIV Clinician                         |
| Dr R Lessells         | Infectious Diseases Specialist        |
| Dr K Naidoo           | Family Medicine                       |
| Dr S Paruk            | Psychiatry                            |
| Prof C Rout           | Anaesthetics                          |
| Dr D Singh            | Critical Care                         |
| Dr A Strode           | Health Law                            |

We wish you well with this study. We would appreciate receiving copies of all publications arising out of this study.

Yours sincerely



**PROFESSOR V RAMBIRITCH**  
Chair: Biomedical Research Ethics Committee

---

Biomedical Research Ethics Committee  
Prof V Rambiritch (Chair)  
UKZN Research Ethics Office Westville Campus, Govan Mbeki Building  
Postal Address: Private Bag X54001, Durban 4000  
Website: <http://research.ukzn.ac.za/Research-Ethics/>

Founding Campuses: ■ Edgewood ■ Howard College ■ Medical School ■ Pietermaritzburg ■ Westville

**INSPIRING GREATNESS**
