# Supplementary material for: A mixed methods process evaluation: understanding the implementation and delivery of HIV prevention services integrated within sexual reproductive health (SRH) with or without peer support amongst adolescents and young adults in rural KwaZulu-Natal, South Africa
Source: PubMed Central journal article supplement (PMC11223316; doi:10.1186/s13063-024-08279-3), 2024-07-03
Supplement: 13063_2024_8279_MOESM3_ESM.pdf [file 13063_2024_8279_MOESM3_ESM.pdf]

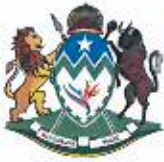

**health**

Department:  
Health  
PROVINCE OF KWAZULU-NATAL

Physical Address: 330 Langalibalele Street, Pietermaritzburg  
Postal Address: Private Bag X9051  
Tel: 033 395 2805/ 3189/ 3123 Fax: 033 394 3782  
Email: [hrkm@kznhealth.gov.za](mailto:hrkm@kznhealth.gov.za)  
[www.kznhealth.gov.za](http://www.kznhealth.gov.za)

**DIRECTORATE:**

Health Research & Knowledge  
Management

Ref: KZ\_201912\_005

Dear Dr M Shahmanesh et al.  
(AHRI)

**Subject: Approval of a Research Proposal:**

1. The research proposal titled '**Isisekelo Sempilo: HIV prevention embedded in sexual health: A pilot trial to optimize peer (Thetha Nami) delivery of HIV prevention and care to adolescents and young adults in rural KwaZulu-Natal.**' was reviewed by the KwaZulu-Natal Department of Health (KZN-DoH).

The proposal is hereby **approved** for research to be undertaken at selected clinics at uMkhanyakude District.

2. You are requested to take note of the following:
  - a. *Kindly liaise with the facility manager BEFORE your research begins in order to ensure that conditions in the facility are conducive to the conduct of your research. These include, but are not limited to, an assurance that the numbers of patients attending the facility are sufficient to support your sample size requirements, and that the space and physical infrastructure of the facility can accommodate the research team and any additional equipment required for the research.*
  - b. *Please ensure that you provide your letter of ethics re-certification to this unit, when the current approval expires.*
  - c. *Provide an interim progress report and final report (electronic and hard copies) when your research is complete.*
3. Your final report must be posted to **HEALTH RESEARCH AND KNOWLEDGE MANAGEMENT, 10-102, PRIVATE BAG X9051, PIETERMARITZBURG, 3200** and e-mail an electronic copy to [hrkm@kznhealth.gov.za](mailto:hrkm@kznhealth.gov.za)

For any additional information please contact Ms G Khumalo on 033-395 3189.

Yours Sincerely

  
\_\_\_\_\_  
Dr E Lutge

Chairperson, Health Research Committee

Date: 18/12/19.
