# Supplementary material for: A mixed methods process evaluation: understanding the implementation and delivery of HIV prevention services integrated within sexual reproductive health (SRH) with or without peer support amongst adolescents and young adults in rural KwaZulu-Natal, South Africa
Source: PubMed Central journal article supplement (PMC11223316; doi:10.1186/s13063-024-08279-3), 2024-07-03
Supplement: 13063_2024_8279_MOESM4_ESM.pdf [file 13063_2024_8279_MOESM4_ESM.pdf]

## COMMUNITY ADVISORY BOARD

Date: 5 September 2019

Biomedical Research Ethics Committee  
University of KwaZulu-Natal  
Research Office, Westville Campus  
Govan Mbeki Building  
Durban

Dear Sir/Madam

**Project title: *Isisekelo Sempilo: HIV prevention embedded in sexual health: A pilot trial to optimize peer-led delivery of antiretroviral based HIV prevention and care to adolescents and young adults in rural KwaZulu-Natal***

This serves to advise that the above-mentioned study was presented in detail to the Africa Health Research Institute Community Advisory Board (AHRI CAB), during a special meeting held on the 5<sup>th</sup> September 2019

We, as AHRI CAB members, asked questions about a wide range of aspects relating to the study, particularly regarding the ethical astuteness of the study. The questions and comments were adequately addressed by the study Project Leader, Maryam Shahmanesh. She outlined the study design and methodology, answered questions from the CAB about the study and their experience in research.

We carefully considered the benefits of the study to individual participants and the community as whole. We supported the study and gave permission that the study is very good for the community researched by AHRI.

In a case where the study PI consider changing or deviating from the initial study protocol, CAB must be properly informed, failing which may result in the study being terminated.

After considering benefits that the study will provide, we then granted the study approval on condition that it complies, mainly with the provisions of section 8, subsection 8.1. to 8.3. of the CAB's Constitution.

The onus is thus on the researcher to familiarise themselves with CAB's constitutional provisions.

Yours sincerely



CAB Chairperson  
Mr SK Zulu



CAB Secretary  
Ms P Dlamini

---

### DURBAN

K-RITH Tower Building, 719 Umbilo Road, Durban  
Private Bag X7, Congella, 4013, South Africa  
T +27 (0)31 260 4991  
E durban@ahri.org

### SOMKHELE

Africa Centre Building, via R618 to Hlabisa, Somkhele, Mtubatuba  
PO Box 198, Mtubatuba, 3935, South Africa  
T +27 (0)35 5507500  
E somkhele@ahri.org

[www.ahri.org](http://www.ahri.org)  

Africa Health Research Institute (AHRI)  
is the operational name of K-RITH (NPC),  
a Registered Non-Profit Company 2011/011985/08
